# Supplementary material for: Construction and characterization of a genome-scale ordered mutant collection of Bacteroides thetaiotaomicron
Source: PubMed Central journal article supplement (PMC9758874; doi:10.1186/s12915-022-01481-2), 2022-12-17

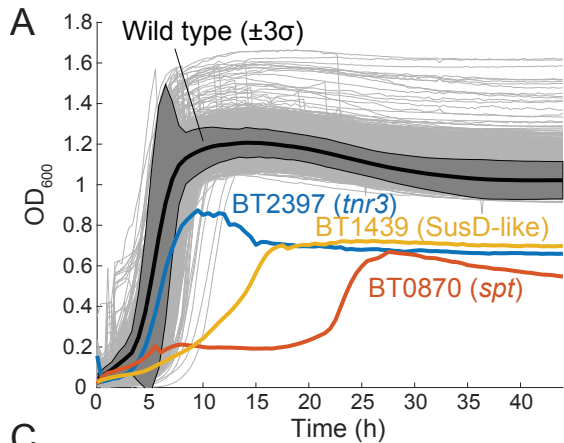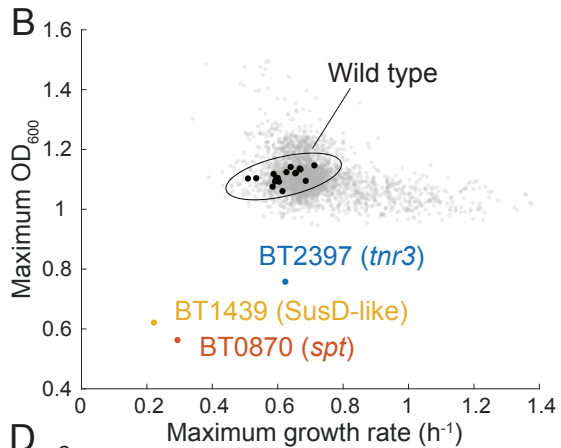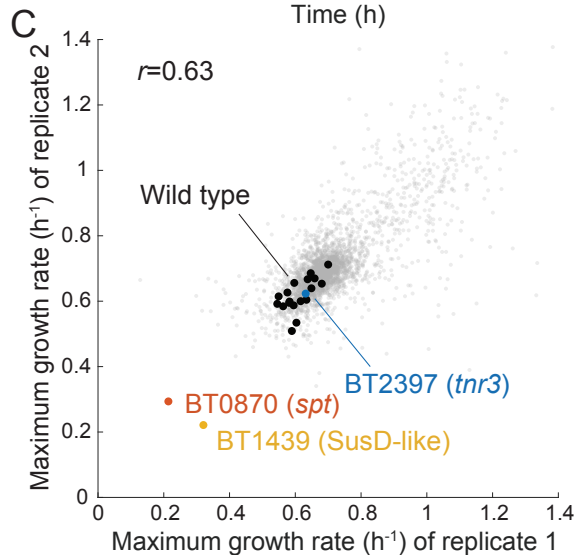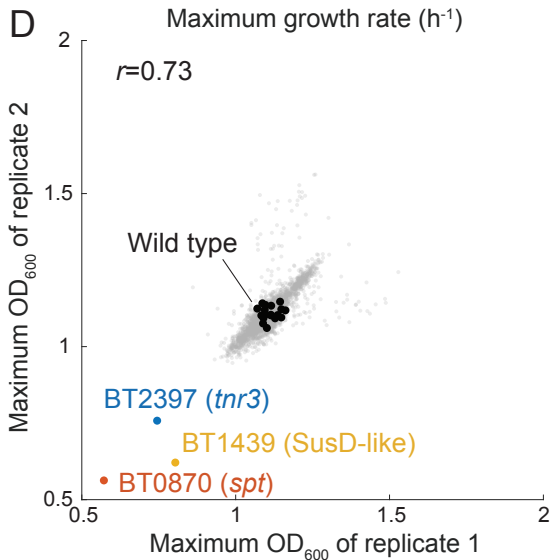

Supplement: 12915_2022_1481_MOESM4_ESM.pdf [file 12915_2022_1481_MOESM4_ESM.pdf]
