# Supplementary material for: Construction and characterization of a genome-scale ordered mutant collection of Bacteroides thetaiotaomicron
Source: PubMed Central journal article supplement (PMC9758874; doi:10.1186/s12915-022-01481-2), 2022-12-17

**A**

## Imaged directly from cryostocks

BT2397  
(progenitor collection)BT2397  
(condensed collection)BT2397\* multi-insertion  
(progenitor collection)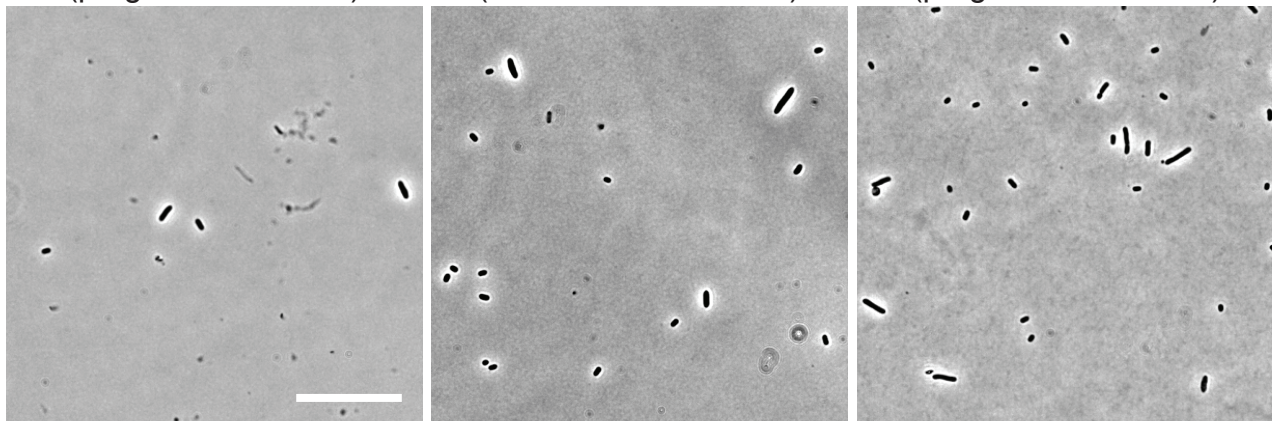**B**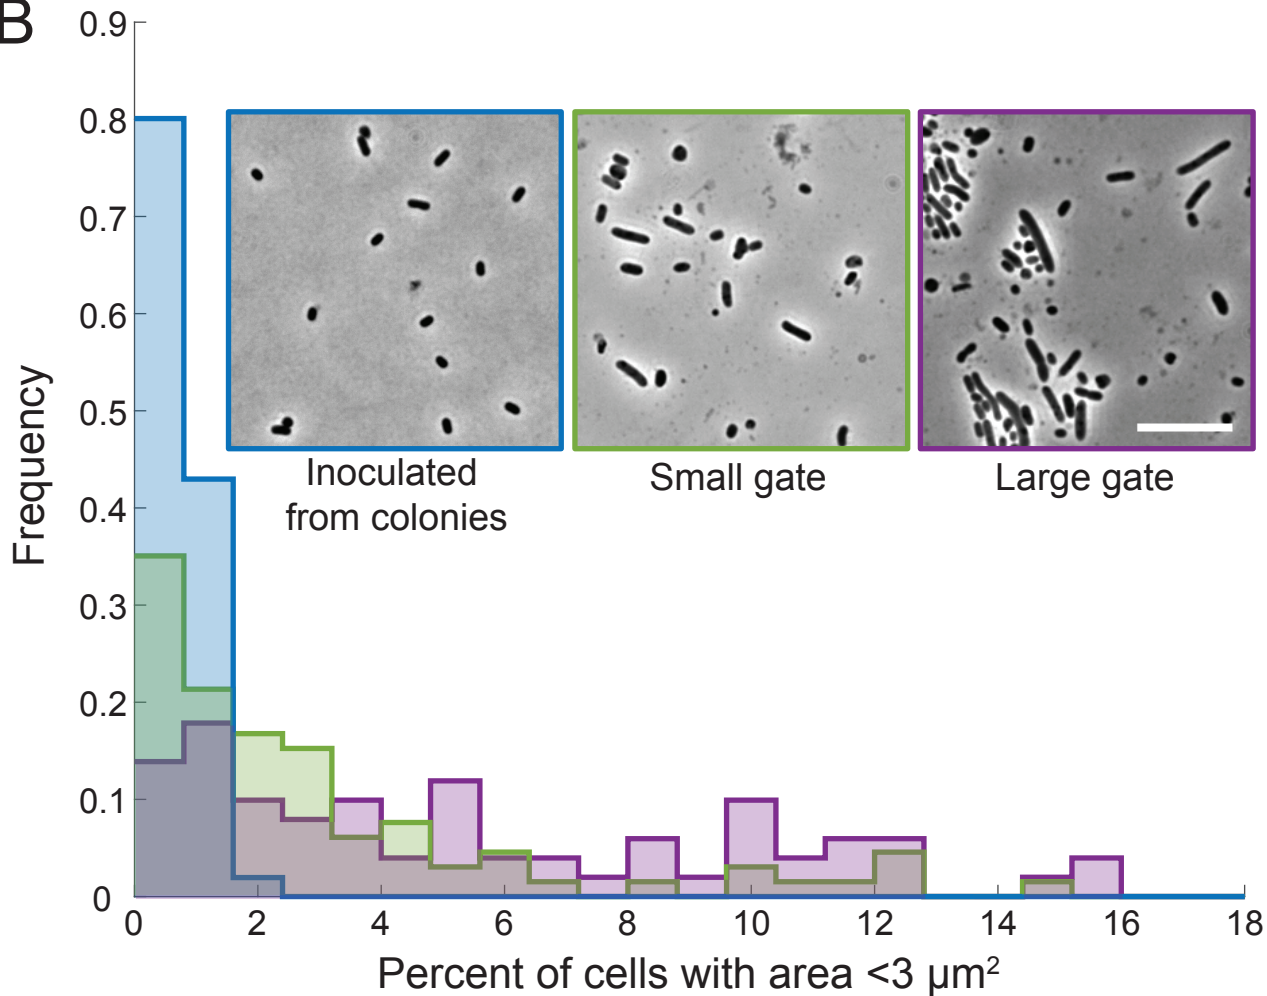

Supplement: 12915_2022_1481_MOESM6_ESM.pdf [file 12915_2022_1481_MOESM6_ESM.pdf]
